# Supplementary material for: Regulation of the terminal maturation of iNKT cells by mediator complex subunit 23
Source: PubMed Central journal article supplement (PMC6155209; doi:10.1038/s41467-018-06372-1), 2018-09-24
Supplement: 41467_2018_6372_MOESM1_ESM.pdf [file 41467_2018_6372_MOESM1_ESM.pdf]

# **Regulation of the terminal maturation of iNKT cells by mediator complex subunit 23**

**Xu et al.**

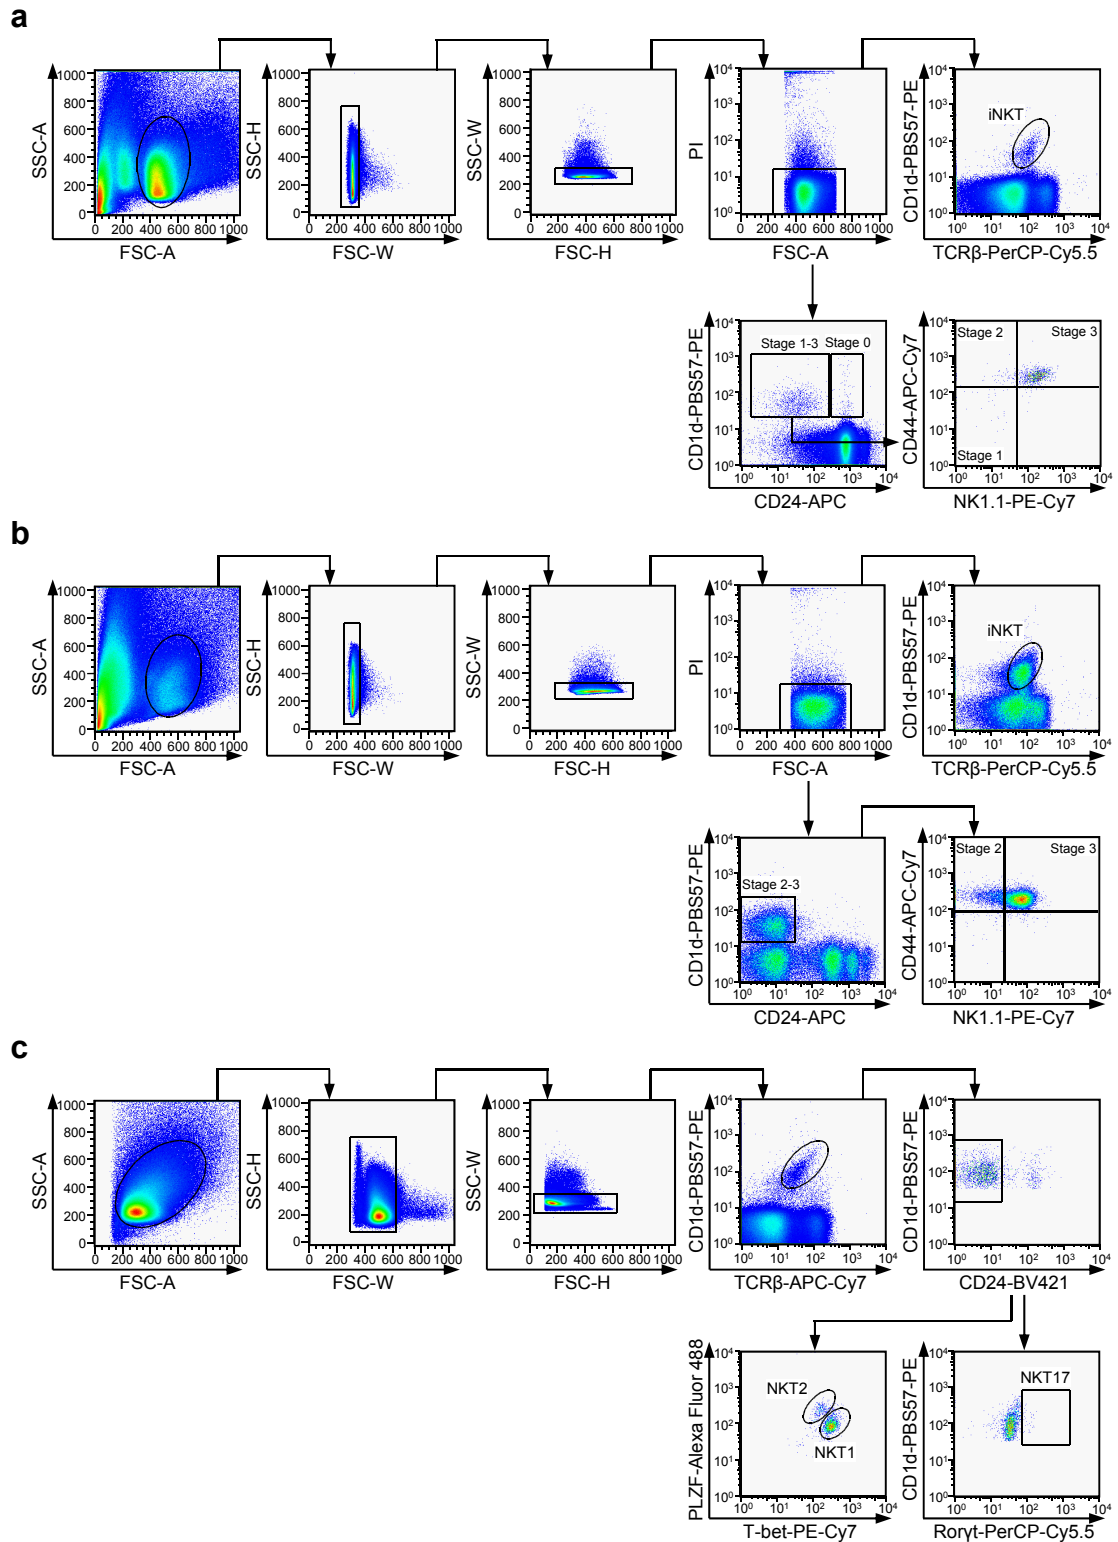

**Supplementary Figure 1.** Gating strategies for flow-cytometric analysis of iNKT cells. (a) Gating strategy to analyze the total iNKT cells ( $\text{TCR}\beta^{\text{int}}\text{CD1d-PBS57}^+$ ), stage 0 iNKT cells ( $\text{CD24}^{\text{high}}\text{CD1d-PBS57}^+$ ), stage 1-3 iNKT cells ( $\text{CD24}^{\text{low}}\text{CD1d-PBS57}^+$ ), stage 1 iNKT cells ( $\text{CD24}^{\text{low}}\text{CD1d-PBS57}^+\text{CD44}^-\text{NK1.1}^-$ ), stage 2 iNKT cells ( $\text{CD24}^{\text{low}}\text{CD1d-PBS57}^+\text{CD44}^+\text{NK1.1}^-$ ) and stage 3 iNKT cells ( $\text{CD24}^{\text{low}}\text{CD1d-PBS57}^+\text{CD44}^+\text{NK1.1}^+$ ) in the thymi presented on Fig. 1a,c and d. (b) Gating strategy to analyze the total iNKT cells ( $\text{TCR}\beta^{\text{int}}\text{CD1d-PBS57}^+$ ) in the spleens, livers and lungs presented on Fig. 1a and Fig. 7d, stage 2-3 iNKT cells ( $\text{CD24}^{\text{low}}\text{CD1d-PBS57}^+$ ), stage 2 iNKT cells ( $\text{CD24}^{\text{low}}\text{CD1d-PBS57}^+\text{CD44}^+\text{NK1.1}^-$ ) and stage 3 iNKT cells ( $\text{CD24}^{\text{low}}\text{CD1d-PBS57}^+\text{CD44}^+\text{NK1.1}^+$ ) in the spleens and livers presented on Fig. 1c and d. (c) Gating strategy to analyze the NKT1 cells ( $\text{CD24}^{\text{low}}\text{TCR}\beta^{\text{int}}\text{CD1d-PBS57}^+\text{PLZF}^{\text{low}}\text{T-bet}^{\text{high}}$ ), NKT2 cells ( $\text{CD24}^{\text{low}}\text{TCR}\beta^{\text{int}}\text{CD1d-PBS57}^+\text{PLZF}^{\text{high}}\text{T-bet}^{\text{low}}$ ) and NKT17 cells ( $\text{CD24}^{\text{low}}\text{TCR}\beta^{\text{int}}\text{CD1d-PBS57}^+\text{ROR}\gamma^{\text{t}}^{\text{high}}$ ) in the thymi, spleens and livers presented on Fig. 2a.

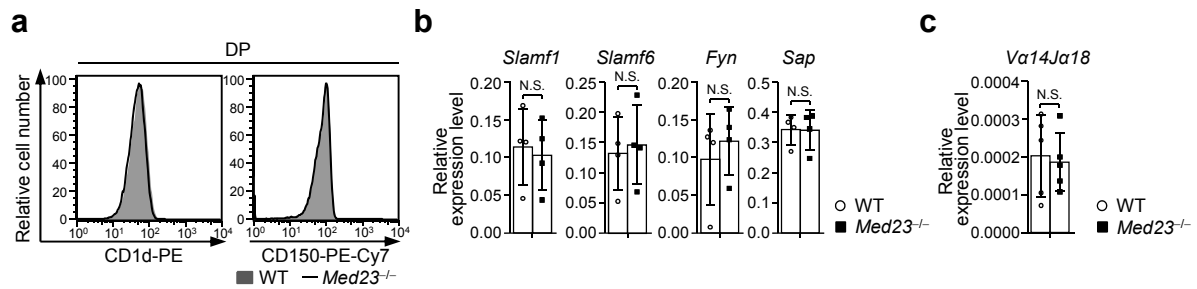

**Supplementary Figure 2.** Med23 deficiency does not affect Va14Ja18 rearrangement and the expression of key signaling molecules in iNKT cell precursors. (a) Representative histograms of surface CD1d and CD150 (Slamf1) in DP cells from WT and *Med23*<sup>-/-</sup> mice. (b) The transcriptional levels of *Slamf1*, *Slamf6*, *Fyn* and *Sap* in sorted DP cells from WT and *Med23*<sup>-/-</sup> mice ( $n = 4$ ). (c) Quantitative RT-PCR analysis of *Va14Ja18* TCR transcript in sorted DP cells from WT and *Med23*<sup>-/-</sup> mice ( $n = 5$ ). All expression levels were normalized to *Gapdh* expression. The data are presented as the mean  $\pm$  s.d. For all panels: N.S.: no significance. All data are representative of or combined from at least three independent experiments.

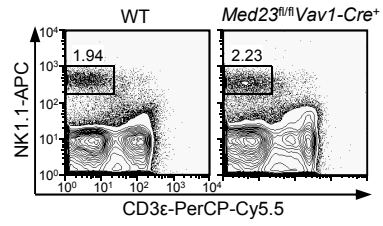

**Supplementary Figure 3.** Med23 does not regulate NK1.1 expression directly. Flow cytometric analysis of NK cells in the spleens from WT and *Med23<sup>fl/fl</sup> Vav1-Cre<sup>+</sup>* mice. The data are representative of at least three independent experiments.

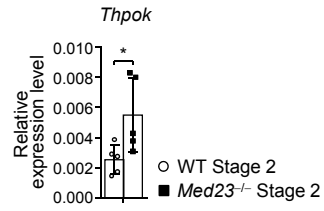

**Supplementary Figure 4.** Loss of Med23 upregulates ThPOK expression in stage 2 iNKT cells. Quantitative RT-PCR analysis of *Thpok* mRNA levels in sorted stage 2 iNKT cells in the thymi from WT and *Med23*<sup>-/-</sup> mice ( $n = 5$ ). The expression levels were normalized to *Gapdh* expression. The data are presented as the mean  $\pm$  s.d. For the panel:  $*P < 0.05$  by Student's *t*-test. The data are combined from at least three independent experiments.

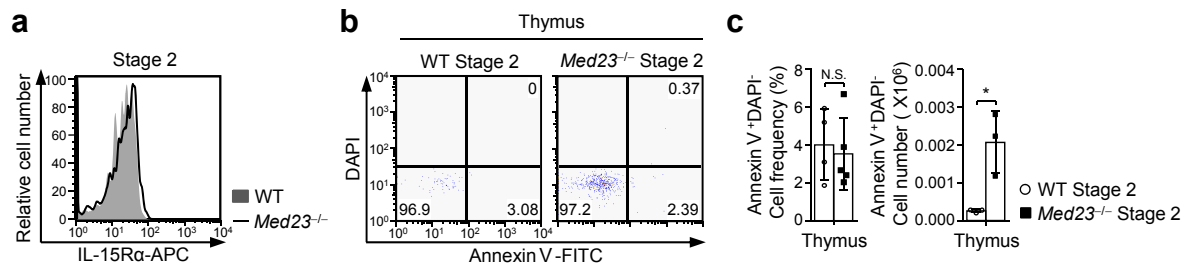

**Supplementary Figure 5.** Med23 deficiency does not affect the expression of IL-15 receptor and survival of stage 2 iNKT cells. (a) Representative histograms of surface IL-15R $\alpha$  in thymic stage 2 iNKT cells from WT and *Med23*<sup>-/-</sup> mice. (b) Survival of stage 2 iNKT cells from WT and *Med23*<sup>-/-</sup> mice was assessed by flow cytometric analysis of Annexin V and DAPI staining. (c) The frequency and cell number of Annexin V<sup>+</sup>DAPI<sup>-</sup> stage 2 iNKT cells from WT and *Med23*<sup>-/-</sup> mice (Annexin V<sup>+</sup>DAPI<sup>-</sup> Cell frequency, WT,  $n = 4$ , KO,  $n = 5$ ; Annexin V<sup>+</sup>DAPI<sup>-</sup> Cell number,  $n = 3$ ). The data are presented as the mean  $\pm$  s.d. For all panels: \* $P < 0.05$  by Student's  $t$ -test; N.S.: no significance. All data are representative of or combined from at least three independent experiments.

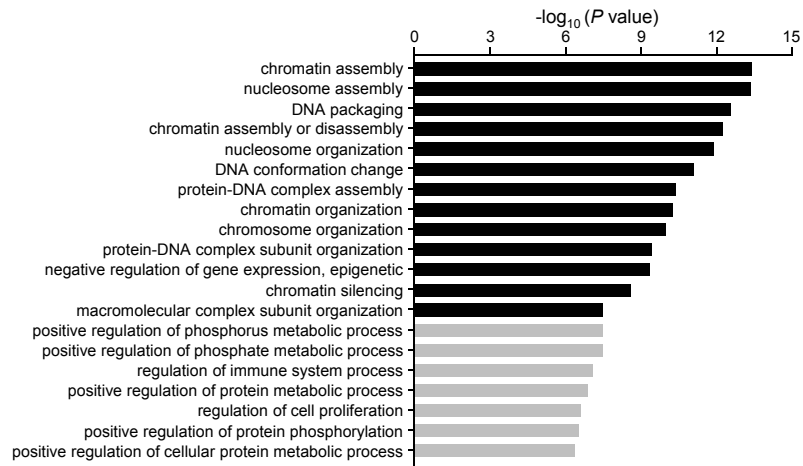

**Supplementary Figure 6.** Gene expression analysis of WT and *Med23*<sup>-/-</sup> stage 2 iNKT cells. Pathway enrichment analysis of differentially expressed genes (modified Fisher's exact *p*-value < 0.05) in thymic stage 2 iNKT cells from WT and *Med23*<sup>-/-</sup> mice (black: categories related to chromosome assembly).

The data are combined from at least three independent experiments.

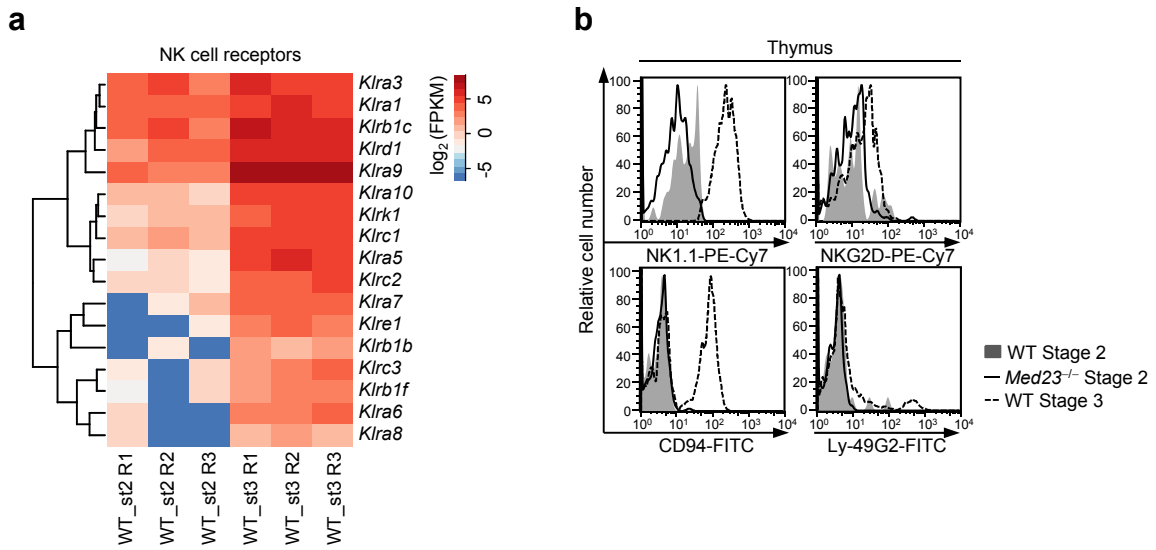

**Supplementary Figure 7.** *Med23* deficiency abolishes NK cell characteristics of iNKT cells. (a) The expression of NK cell receptors in WT stage 2 and stage 3 cells. (b) Representative histograms of surface NK1.1, NKG2D, CD94 and Ly-49G2 in thymic WT stage 2 and stage 3 cells and *Med23*<sup>-/-</sup> stage 2 cells.

The data are representative of or combined from at least three independent experiments.



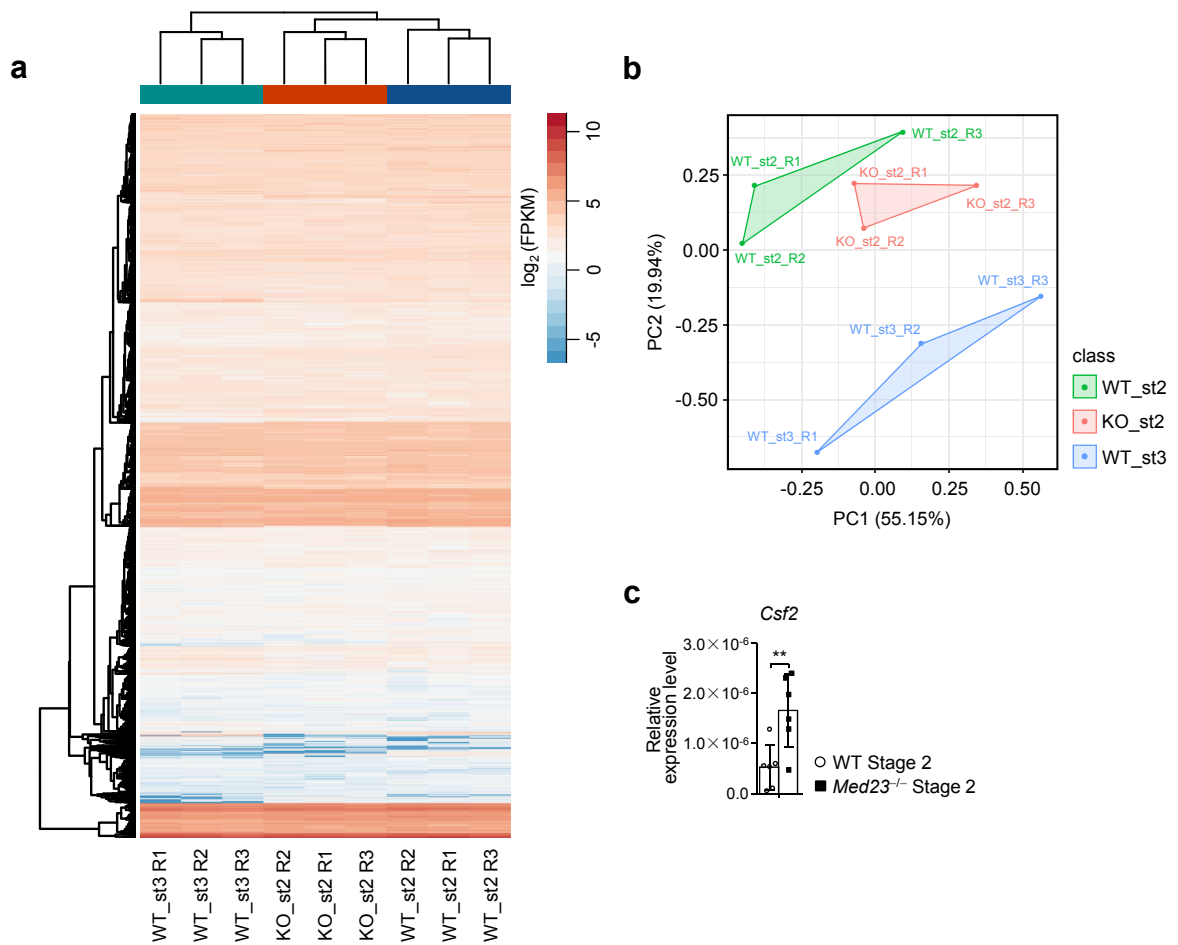

**Supplementary Figure 8.** Gene expression analysis and *Csf-2* expression of *Med23*<sup>-/-</sup> stage 2 iNKT cells. (a) RNA-seq analysis of WT stage 2 and stage 3 cells and *Med23*<sup>-/-</sup> stage 2 cells in the thymi. (b) Principle component analysis of thymic stage 2 and stage 3 cells from WT mice and stage 2 cells from *Med23*<sup>-/-</sup> mice. (c) Quantitative RT-PCR analysis of *Csf2* transcript in sorted stage 2 iNKT cells of the thymus from WT and *Med23*<sup>-/-</sup> mice ( $n = 6$ ). The expression levels were normalized to *Gapdh* expression.

The data are presented as the mean  $\pm$  s.d. For all panels: \*\* $P < 0.01$  by Student's  $t$ -test. All data are combined from at least three independent experiments.

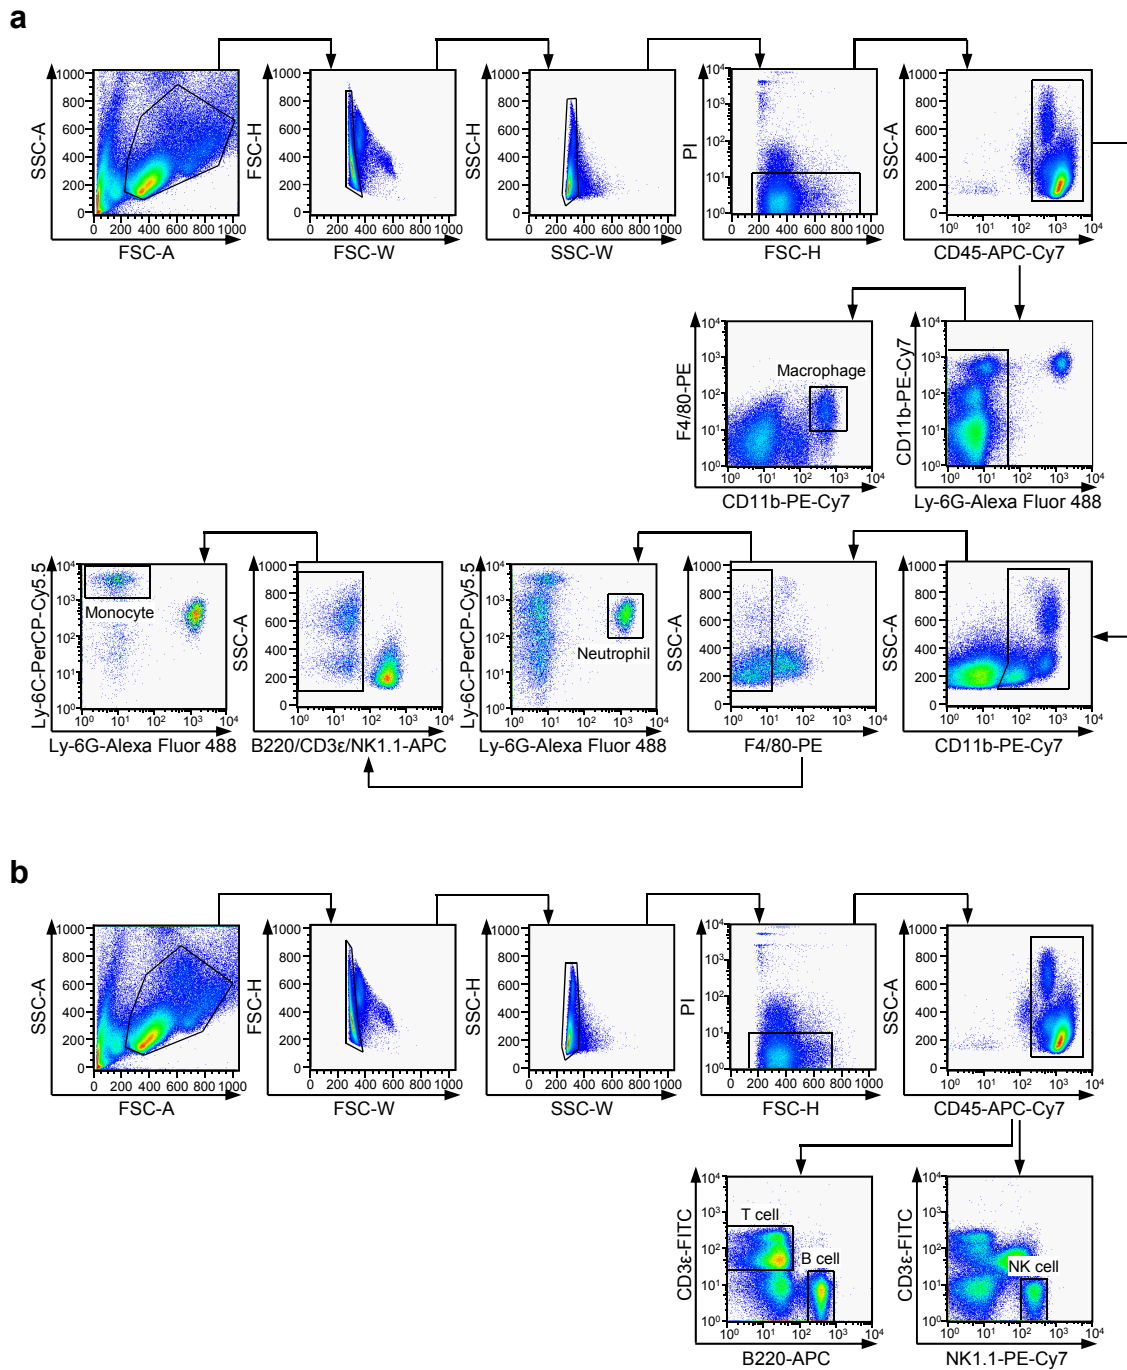

**Supplementary Figure 9.** Gating strategies for flow-cytometric analysis of leukocytes. (a) Gating strategy to analyze the neutrophils ( $CD45^+CD11b^+F4/80^-Ly-6G^+Ly-6C^+$ ), monocytes ( $CD45^+CD11b^+F4/80^-CD3\epsilon^-B220^-NK1.1^-Ly-6G^-Ly-6C^+$ ) and macrophages ( $CD45^+Ly-6G^-CD11b^+F4/80^+$ ) in the livers presented on Fig. 6a. (b) Gating strategy to analyze T cells ( $CD45^+B220^-CD3\epsilon^+$ ), B cells ( $CD45^+CD3\epsilon^-B220^+$ ), and NK cells ( $CD45^+CD3\epsilon^-NK1.1^+$ ) in the livers presented on Fig. 6a.

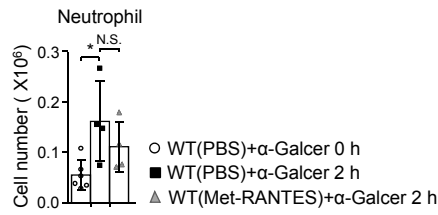

**Supplementary Figure 10.** Recruitment capacity of iNKT cells is slightly reduced by treatment with the CCL5 antagonist Met-RANTES. WT mice were intraperitoneally injected PBS or Met-RANTES 30 min before  $\alpha$ -GalCer administration. The absolute number of neutrophils in the livers of WT mice were measured 0 h or 2 h after  $\alpha$ -GalCer stimulation (0 h,  $n = 6$ ; 2 h,  $n = 4$ ).

The data are presented as the mean  $\pm$  s.d. For the panel: \* $P < 0.05$  by Student's  $t$ -test; N.S.: no significance. The data are combined from at least three independent experiments.

Supplementary Table 1. Primer sequences for genotyping and qPCR

| Primer name             | Sequence                            | Application |
|-------------------------|-------------------------------------|-------------|
| <i>Med23</i> forward    | 5' -GCGGCCGCTATATGCACTGTTAGTGATT-3' | genotyping  |
| <i>Med23</i> reverse    | 5' -GTCGACCTTAGAAGAAAGCTCAAACAT-3'  | genotyping  |
| <i>Cd4-Cre</i> forward  | 5' -CCTGATCCTGGCAATTTCCG -3'        | genotyping  |
| <i>Cd4-Cre</i> reverse  | 5' -CCCAACCAACAAGAGCTC-3'           | genotyping  |
| <i>Vav1-Cre</i> forward | 5' -AGATGCCAGGACATCAGGAACCTG-3'     | genotyping  |
| <i>Vav1-Cre</i> reverse | 5' -ATCAGCCACACCAGACACAGAGATC-3'    | genotyping  |
| <i>Gapdh</i> forward    | 5' -CGACTTCAACAGCAACTCCCCTCTTCC-3'  | qPCR        |
| <i>Gapdh</i> reverse    | 5' -TGGGTGGTCCAGGGTTTCTTACTCCTT-3'  | qPCR        |
| <i>Slamf1</i> forward   | 5' -TAATCTTCATCCTGGTTTTACGGC-3'     | qPCR        |
| <i>Slamf1</i> reverse   | 5' -CCCTGATTTCTGTACTTGGGCATA-3'     | qPCR        |
| <i>Slamf6</i> forward   | 5' -ACTCCGCCTGTCAGAGGATGGT-3'       | qPCR        |
| <i>Slamf6</i> reverse   | 5' -CTAGAACGCCATTCATTAGCTGGG-3'     | qPCR        |
| <i>Fyn</i> forward      | 5' -GCGTGACCTCCATCCCGAACTA-3'       | qPCR        |
| <i>Fyn</i> reverse      | 5' -TAAAGCGCCACAAACAGTGTAC-3'       | qPCR        |
| <i>Sap</i> forward      | 5' -AGCGAGAGTGTCCCTGGCGT-3'         | qPCR        |
| <i>Sap</i> reverse      | 5' -GATCCGGCTTCTGAAACGCTG-3'        | qPCR        |
| <i>Va14Ja18</i> forward | 5' -GGATGACACTGCCACCTACA-3'         | qPCR        |
| <i>Va14Ja18</i> reverse | 5' -CTGAGTCCCAGCTCCAAAA-3'          | qPCR        |
| <i>Med23</i> forward    | 5' -GCCTATTGCCGGCCTACTTT-3'         | qPCR        |
| <i>Med23</i> reverse    | 5' -CTGTGGGCCTGAAGGTATCC-3'         | qPCR        |
| <i>Tbx21</i> forward    | 5' -CAACAACCCCTTTGCCAAAG-3'         | qPCR        |
| <i>Tbx21</i> reverse    | 5' -TCCCCAAGCAGTTGACAGT-3'          | qPCR        |
| <i>Egr2</i> forward     | 5' -CCTTTGACCAGATGAACGGAGTG-3'      | qPCR        |
| <i>Egr2</i> reverse     | 5' -CTGGTTTCTAGGTGCAGAGATGG-3'      | qPCR        |
| <i>Med1</i> forward     | 5' -CTTGTGCGTCAAGTAATGGAGA-3'       | qPCR        |
| <i>Med1</i> reverse     | 5' -TTCAAACGATCAGTCATTGCT-3'        | qPCR        |
| <i>Tsc-1</i> forward    | 5' -AAGCATCCTGACACCACCAAG-3'        | qPCR        |
| <i>Tsc-1</i> reverse    | 5' -GGATCTCCAGTTCCAACACCC-3'        | qPCR        |
| <i>Pten</i> forward     | 5' -TGGATTGACTTAGACTTGACCT-3'       | qPCR        |
| <i>Pten</i> reverse     | 5' -GCGGTGTCATAATGTCTCTCAG-3'       | qPCR        |
| <i>c-Jun</i> forward    | 5' -GTCCCCTATCGACATGGAGTCT-3'       | qPCR        |
| <i>c-Jun</i> reverse    | 5' -GGAGTTTTGCGCTTTCAAGGT-3'        | qPCR        |
| <i>Batf</i> forward     | 5' -CACAGAAAGCCGACACCCTT-3'         | qPCR        |
| <i>Batf</i> reverse     | 5' -GCTGTTTGTCTCTTTGCGGA-3'         | qPCR        |
| <i>Xcl1</i> forward     | 5' -GCGATCAAGACTGTGGAT-3'           | qPCR        |
| <i>Xcl1</i> reverse     | 5' -CTGCTTAACGAGTGAGGAA-3'          | qPCR        |
| <i>Ccl5</i> forward     | 5' -TTTGCCTACCTCTCCCTCG-3'          | qPCR        |
| <i>Ccl5</i> reverse     | 5' -CGACTGCAAGATTGGAGCACT-3'        | qPCR        |
| <i>Ccl4</i> forward     | 5' -TTCTGCTGTTTCTCTTACACCT-3'       | qPCR        |
| <i>Ccl4</i> reverse     | 5' -CTGTCTGCCTCTTTGGTCAG-3'         | qPCR        |
| <i>Thpok</i> forward    | 5' -AGTCTGTCACAAGATAATCCA-3'        | qPCR        |
| <i>Thpok</i> reverse    | 5' -GGTTCTTGAGGTCGTAGC-3'           | qPCR        |
| <i>Csf2</i> forward     | 5' -CTCTAACGAGTTCTCCTTCA-3'         | qPCR        |
| <i>Csf2</i> reverse     | 5' -GGCAGTATGTCTGGTAGTAG-3'         | qPCR        |

Supplementary Table 2. Fluorescently conjugated protein or antibodies used for flow cytometry

| Target              | Fluorochrome | Clone        | Manufacturer | Catalog    | Dilution ratio (vol/vol) |
|---------------------|--------------|--------------|--------------|------------|--------------------------|
| Cell surface stain  |              |              |              |            |                          |
| TCR $\beta$         | FITC         | H57-597      | BD           | 553171     | 1:150                    |
| TCR $\beta$         | PerCP-Cy5.5  | H57-597      | BD           | 560657     | 1:150                    |
| TCR $\beta$         | APC-Cy7      | H57-597      | BioLegend    | 109220     | 1:150                    |
| CD11b               | PE-Cy7       | M1/70        | BD           | 552850     | 1:150                    |
| CD1d                | PE           | 1B1          | BD           | 553846     | 1:150                    |
| CD3 $\epsilon$      | APC          | 145-2C11     | BD           | 553066     | 1:150                    |
| CD3 $\epsilon$      | FITC         | 145-2C11     | BioLegend    | 100306     | 1:150                    |
| CD3 $\epsilon$      | PerCP-Cy5.5  | 145-2C11     | BD           | 551163     | 1:150                    |
| CD45                | APC-Cy7      | 30-F11       | BD           | 561037     | 1:150                    |
| CD94                | FITC         | 18d3         | eBioscience  | 11-0941-81 | 1:150                    |
| Ly-49G2             | FITC         | eBio4D11     | eBioscience  | 11-5781-81 | 1:150                    |
| F4/80               | PE           | BM8          | eBioscience  | 12-4801-80 | 1:150                    |
| NKG2D               | PE-Cy7       | CX5          | eBioscience  | 25-5882-81 | 1:150                    |
| CD24                | FITC         | M1/69        | BioLegend    | 101806     | 1:150                    |
| CD24                | APC          | M1/69        | BioLegend    | 101814     | 1:150                    |
| CD24                | BV421        | M1/69        | BioLegend    | 101826     | 1:150                    |
| Ly-6G               | AF 488       | 1A8          | BioLegend    | 127625     | 1:300                    |
| Ly-6C               | PerCP-Cy5.5  | HK1.4        | BioLegend    | 128011     | 1:300                    |
| NK1.1               | PE-Cy7       | PK136        | BioLegend    | 108714     | 1:150                    |
| NK1.1               | APC          | PK136        | BioLegend    | 108710     | 1:150                    |
| B220                | APC          | RA3-6B2      | BioLegend    | 103211     | 1:150                    |
| CD44                | APC-Cy7      | IM7          | BioLegend    | 103028     | 1:150                    |
| CD44                | FITC         | IM7          | BD           | 553133     | 1:150                    |
| CD150               | PE-Cy7       | TC15-12F12.2 | BioLegend    | 115913     | 1:150                    |
| IL-15Ra             | APC          | DNT15Ra      | eBioscience  | 17-7149-82 | 1:150                    |
| Annexin V           | FITC         |              | BioLegend    | 640945     | 1:20                     |
| Intracellular stain |              |              |              |            |                          |
| ROR $\gamma$ t      | PerCP-Cy5.5  | Q31-378      | BD           | 562683     | 1:12                     |
| ROR $\gamma$ t      | PE           | B2D          | eBioscience  | 12-6981-80 | 1:30                     |
| PLZF                | AF 488       | Mags.21F7    | eBioscience  | 53-9320-82 | 1:15                     |
| IFN- $\gamma$       | AF 488       | XMG1.2       | eBioscience  | 53-7311-82 | 1:150                    |
| CCL5                | PE           | 2E9/CCL5     | BioLegend    | 149103     | 1:150                    |
| T-bet               | PE           | 4B10         | BioLegend    | 644809     | 1:12                     |
| T-bet               | PE-Cy7       | 4B10         | BioLegend    | 644823     | 1:30                     |
| IL-4                | PE-Cy7       | 11B11        | BioLegend    | 504118     | 1:150                    |

AF, Alexa Fluor; APC, allophycocyanin; BV, brilliant violet; FITC, fluorescein isothiocyanate; PE, phycoerythrin; PerCP, peridinin–chlorophyll–protein.
